# Supplementary material for: Self-assembling small-molecule adjuvants as antigen nano-carriers
Source: Royal Society of Chemistry journal article supplement (doi:10.1039/d2cc05016a), 2022-01-01
Supplement: d2cc05016a1.pdf [file d2cc05016a1.pdf]

# Self-assembling small-molecule adjuvants as antigen nano-carriers

Shuyu Jin,<sup>a, b</sup> Shaohua Zhuo,<sup>c</sup> Yasushi Takemoto,<sup>b</sup> Yanmei Li<sup>c, f, g</sup> and Motonari Uesugi<sup>\*b, d, e</sup>

<sup>a</sup> *Graduate School of Medicine, Kyoto University, Uji, Kyoto 611-0011, Japan*

<sup>b</sup> *Institute for Chemical Research, Kyoto University, Uji, Kyoto 611-0011, Japan*

<sup>c</sup> *Key Lab of Bioorganic Phosphorus Chemistry & Chemical Biology, Department of Chemistry, Tsinghua University, Beijing 100084, China*

<sup>d</sup> *Institute for Integrated Cell-Material Sciences (WPI-iCeMS), Kyoto University, Kyoto 606-8501, Japan*

<sup>e</sup> *School of Pharmacy, Fudan University, Shanghai 201203, China*

<sup>f</sup> *Beijing Institute for Brain Disorders, Beijing 100069, China*

<sup>g</sup> *Center for Synthetic and Systems Biology, Tsinghua University, Beijing 100084, China*

## Supplementary Contents

|                            |      |
|----------------------------|------|
| 1) Supplementary figures   | 2-8  |
| 2) Experimental procedures | 9-23 |

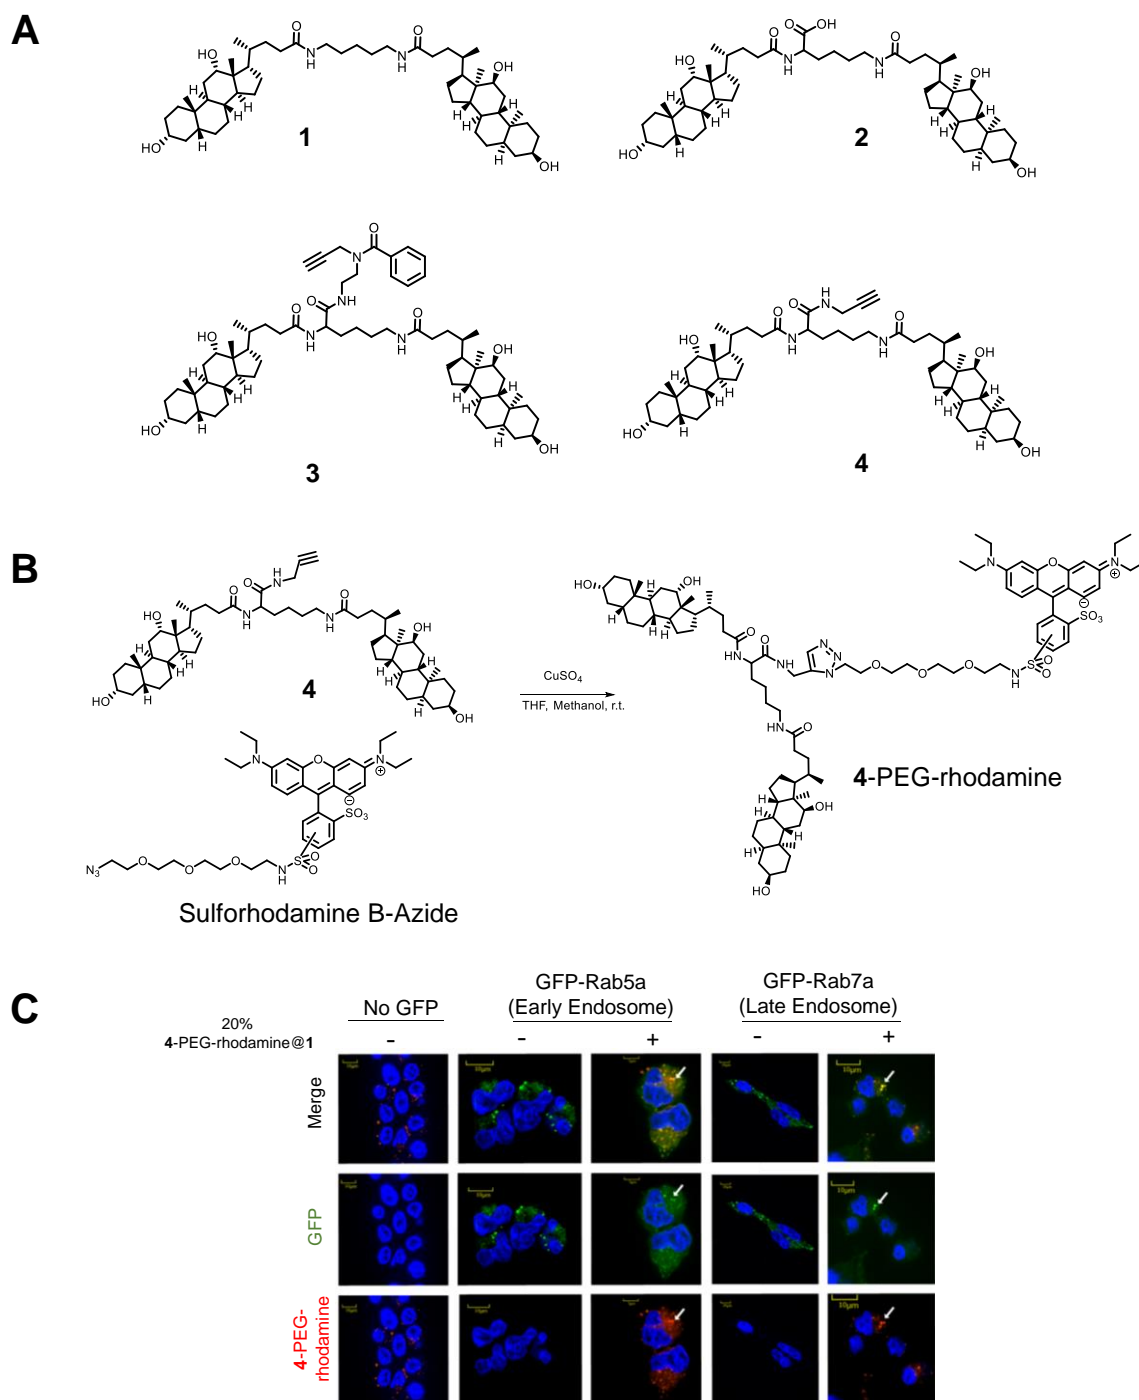

**Fig. S1.** Structures of cholicamide analogs. (A) Chemical structures of molecule **1**, **2**, **3** and **4**. (B) Synthesis of **4**-PEG-rhodamine. (C) Co-localization of early and late endosome with 20% **4**-PEG-rhodamine@1. HEK293 cells were transfected with CellLight™ Early Endosomes-GFP or CellLight™ Late Endosomes-GFP to express GFP fusions of Rab5a and Rab7a, early and late endosome markers, respectively. After incubating at 37°C for 24 h, the cells were incubated with 20% **4**-PEG-rhodamine@1 (50 μM) at 37°C. After 4 h, the cells were washed with PBS 3 times and stained with Hoechst 33342 (1:1000). Scale bar: 10 μm.

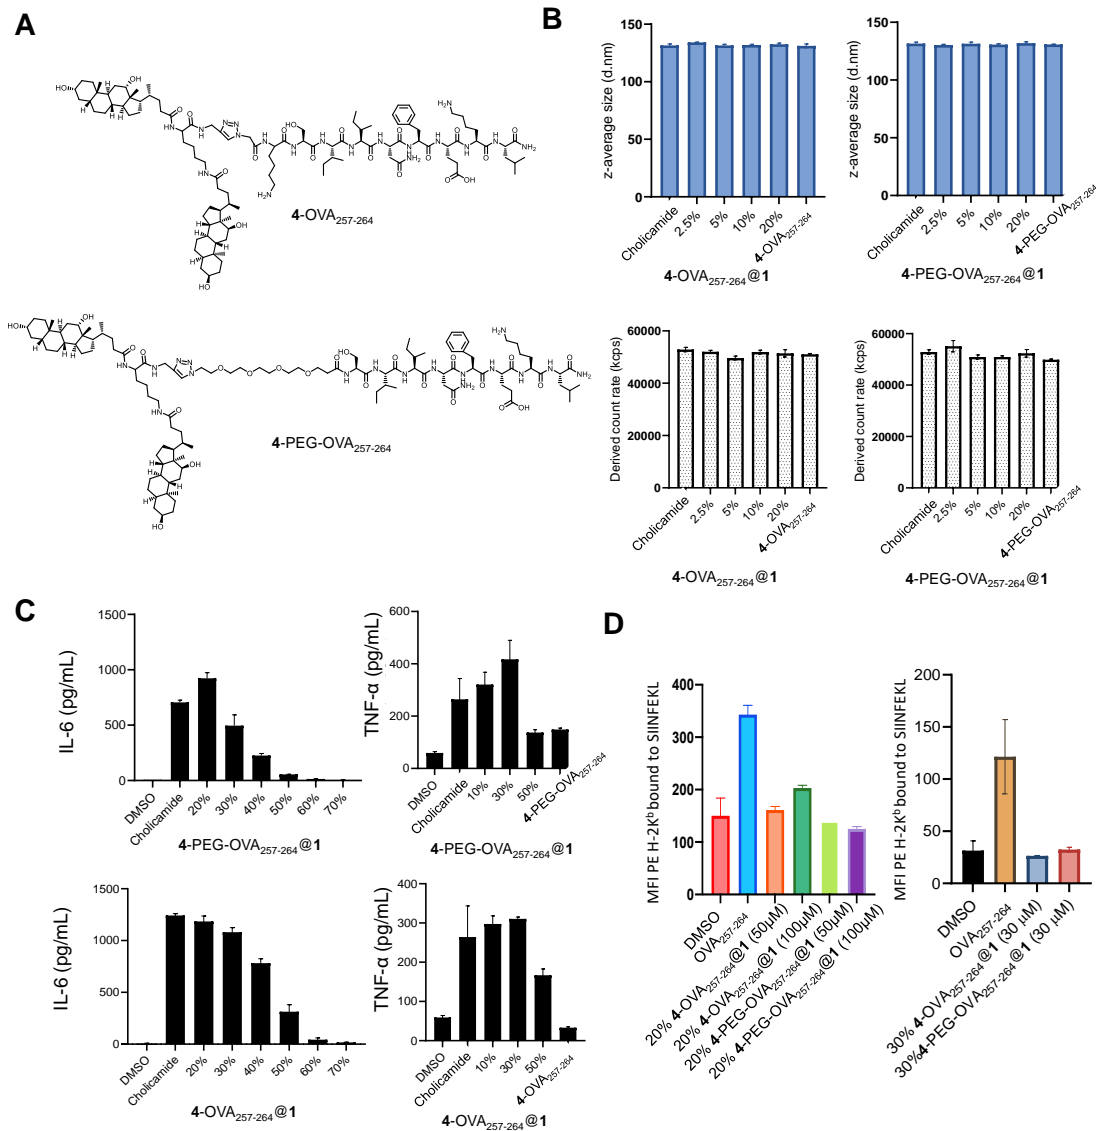

**Fig. S2.** Characterization and evaluation of conjugates derived from OVA<sub>257-264</sub>. (A) Chemical structures of **4-OVA<sub>257-264</sub>** and **4-PEG-OVA<sub>257-264</sub>**. (B) The Z-average sizes and derived count rates of **4-OVA<sub>257-264</sub>@1** and **4-PEG-OVA<sub>257-264</sub>@1** at 30  $\mu$ M in culture media as measured by DLS. (C) TNF- $\alpha$  and IL-6 production upon treatment of RAW264.7 cells with **4-OVA<sub>257-264</sub>@1** (30  $\mu$ M) and **4-PEG-OVA<sub>257-264</sub>@1** (30  $\mu$ M). (D) Flow cytometric analysis of antigen presentation in BMDCs. BMDCs were treated with 2  $\mu$ g OVA<sub>257-264</sub>, **4-OVA<sub>257-264</sub>@1**, or **4-PEG-OVA<sub>257-264</sub>@1** for 24 h and collected for antigen presenting efficiency study. The presented antigens were detected with PE H-2K<sup>b</sup> bound SIINFEKL antibody (0.5  $\mu$ g in 100  $\mu$ L FACS buffer). Mean fluorescence intensity (MFI) was quantified by FlowJo V10.

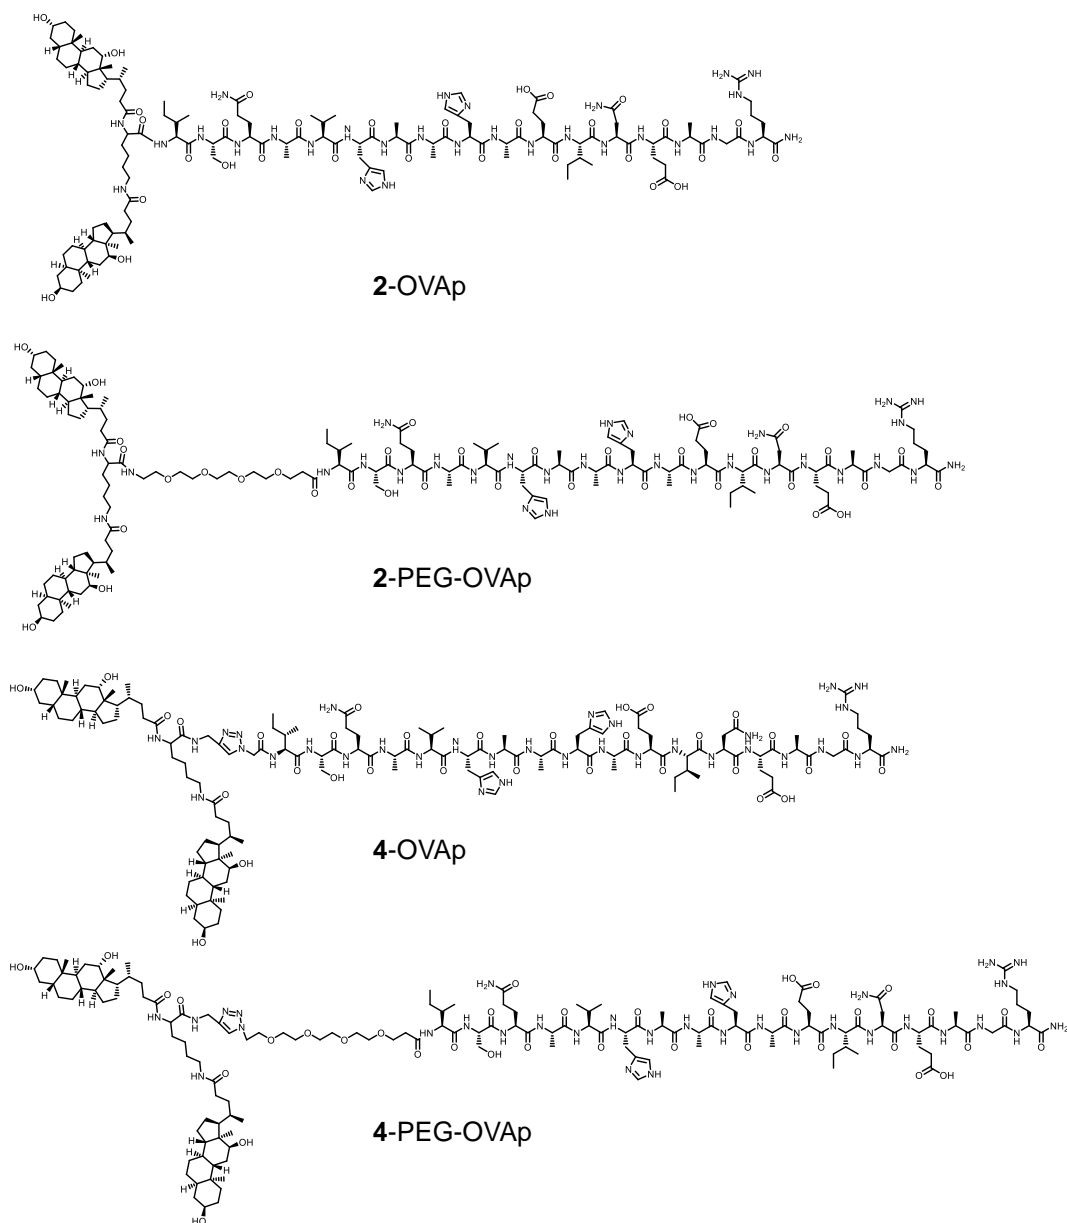

**Fig. S3.** Chemical structures of **2-OVap**, **2-PEG-OVap**, **4-OVap**, and **4-PEG-OVap**.

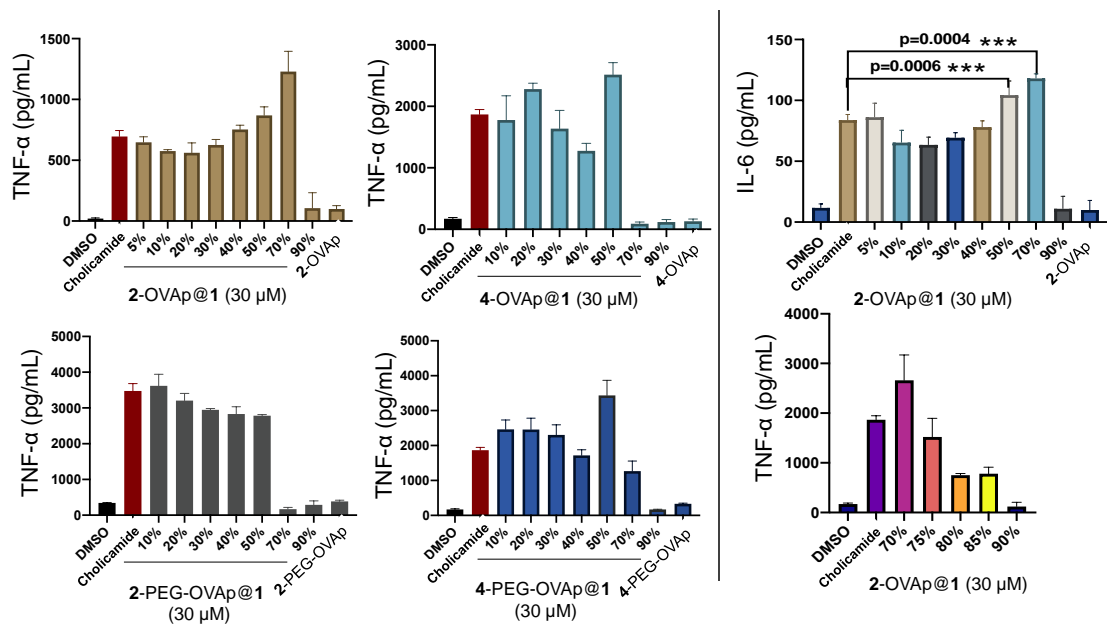

**Fig. S4.** TNF- $\alpha$  and IL-6 production upon treatment with co-assemblies. RAW264.7 macrophage cells were incubated with conjugate@1 (30  $\mu$ M) at various percentages for 24 h. The cytokines (IL-6 and TNF- $\alpha$ ) in the supernatants were quantified by ELISA. *Left panel:* Comparison of the ability of the four conjugates to induce TNF- $\alpha$ . *Right panel:* In-depth analysis of 2-OVA@1. Its ability to induce TNF- $\alpha$  at 70-90% and IL-6 at 10-90% is shown. All assays were performed in triplicates.

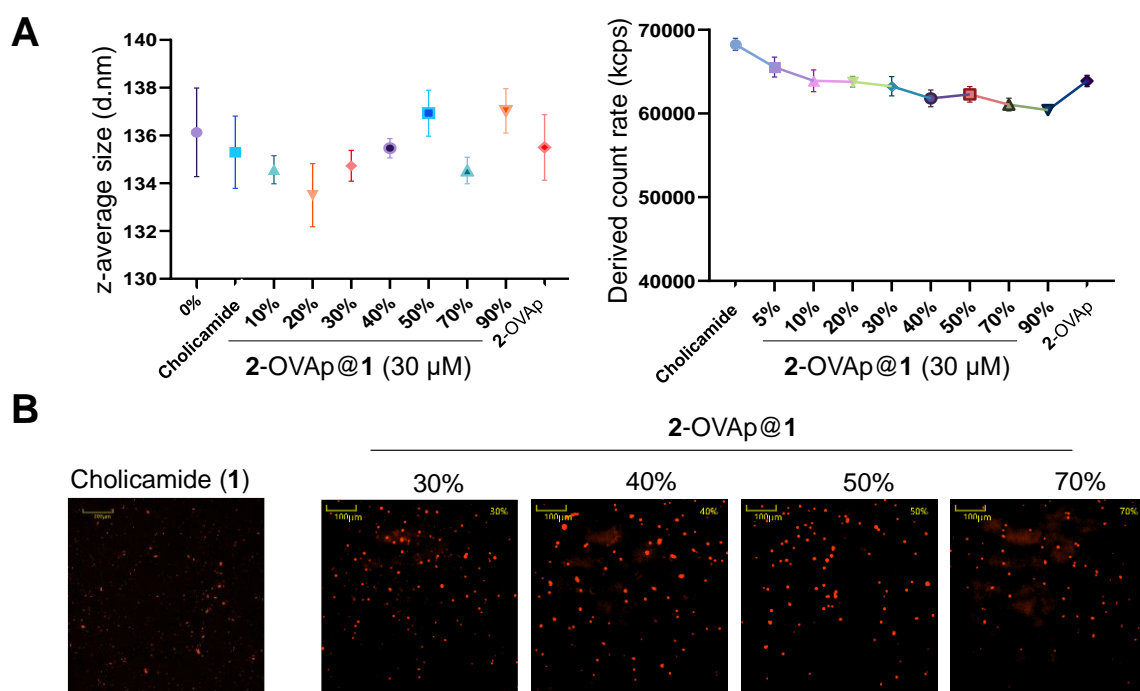

**Fig. S5.** Co-assembly of **2-OVAp@1**. (A) The z-average sizes and derived count rates of **2-OVAp@1** in a DMEM culture medium as measured by DLS. (B) Confocal microscopic images of 50  $\mu$ M **2-OVAp@1** at 30%, 40%, 50%, and 70% in a DMEM culture medium with Nile Red (15  $\mu$ M).

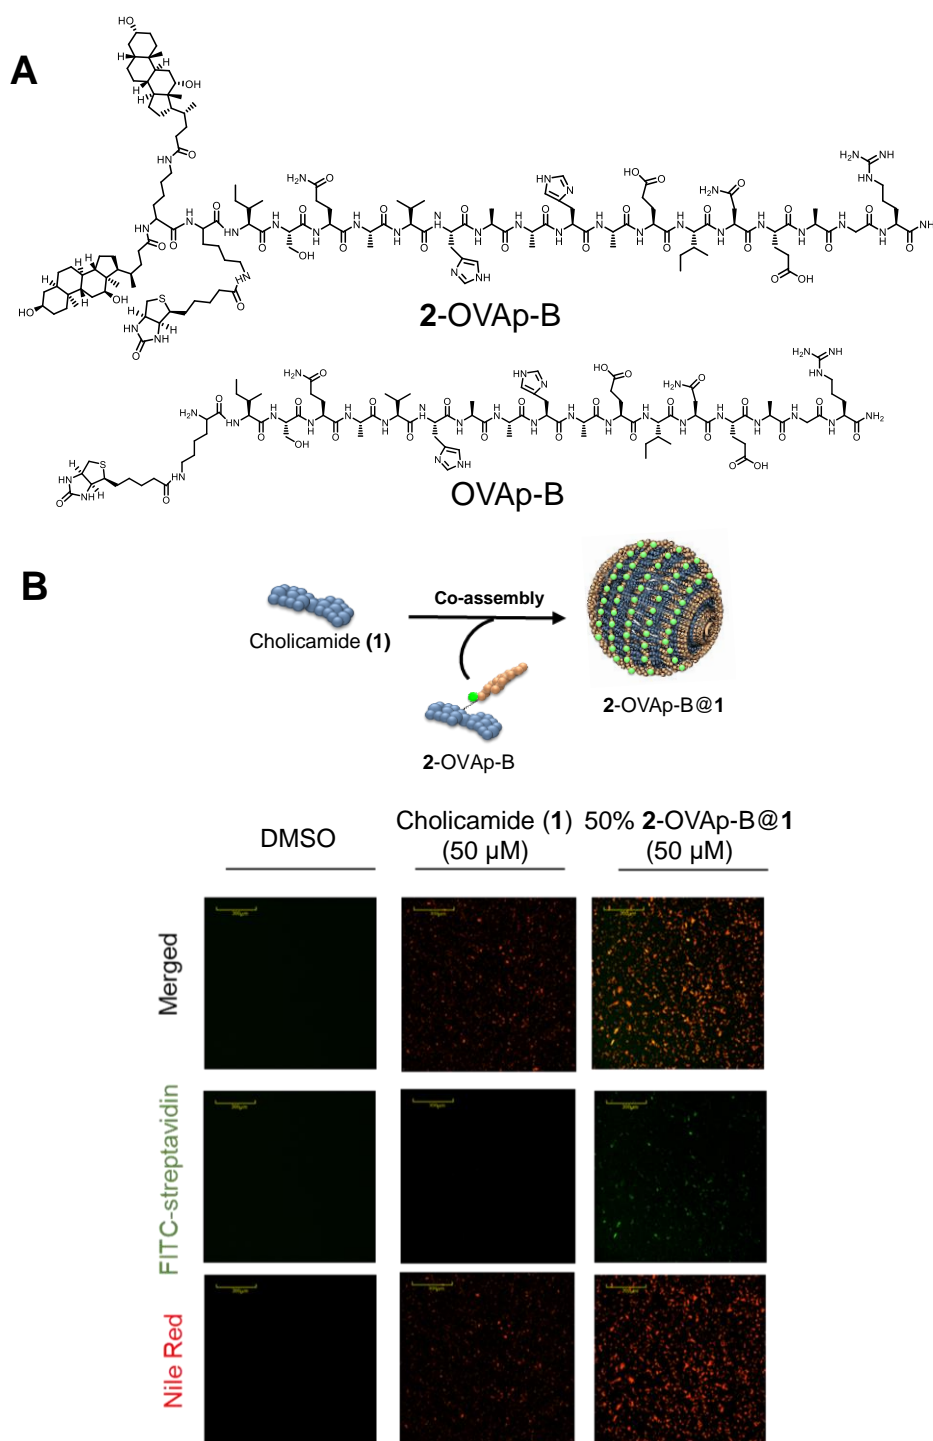

**Fig. S6.** Design of 2-OVAp-B and OVA-B. (A) Chemical structures of 2-OVAp-B and OVAp-B. (B) Confocal images of 50% 2-OVAp-B@1 and cholicamide (1) at 50  $\mu$ M stained with Nile Red (15  $\mu$ M) and FITC-streptavidin. 50% 2-OVAp-B@1 or cholicamide (1) was added to DMEM containing 1.25% FBS. After 30 min, 1  $\mu$ L FITC-streptavidin (0.5 mg/mL) was added to each sample. Images were captured after incubation for overnight at 37  $^{\circ}$ C.

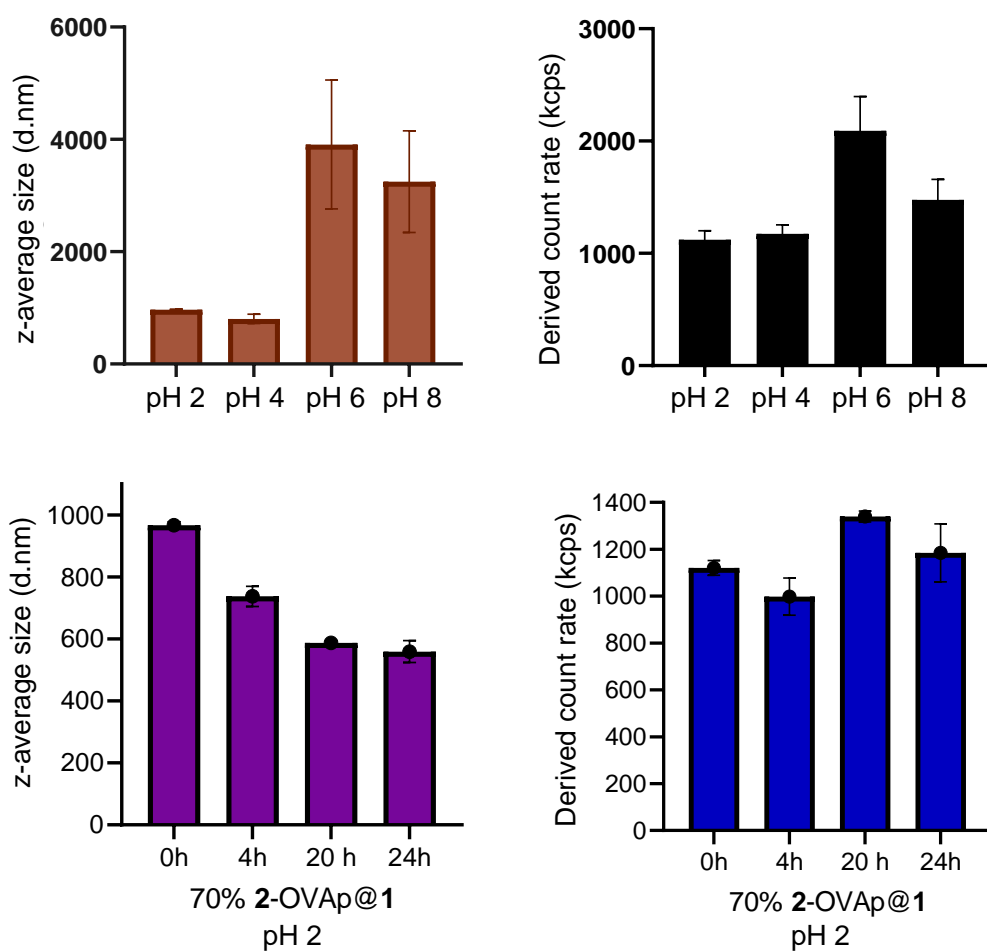

**Fig. S7.** The z-average sizes and derived count rates of 70% 2-OVAp@1 (30  $\mu$ M) in phosphate buffers (pH 2-8) as measured by DLS.

## Experimental procedure

### Material and Methods

#### Biological reagents

Dulbecco's modified Eagle medium (DMEM) and PBS (pH 7.4) were purchased from Thermo Fisher Scientific. RPMI1640 medium and Penicillin-streptomycin mixed solution (P/S) were purchased from Nacalai Tesque Inc. Fetal bovine serum (FBS) was purchased from Biowest and Sigma-Aldrich. All RPMI and DMEM used in experiments were supplemented with 1% (v/v) Penicillin-Streptomycin. TNF- $\alpha$  and IL-6 ELISA kits were purchased from R&D Systems. Antibodies were purchased from BioLegend and described in each experiment.

#### Cell preparation and culture

RAW264.7 cells were purchased from ATCC and were cultured in DMEM containing 10% FBS and 1% P/S. C57BL/6 mice were purchased from CLEA Japan, Inc. BMDCs (bone marrow-derived dendritic cells) were prepared as previously described.<sup>1</sup> Briefly, Mice were sacrificed, and the bone marrow from the pelvis, femur, and tibia was collected and purified by treatment with ACK lysis buffer (for the elimination of red blood cells) to give bone marrow cells (BM cells). BM cells in RPMI1640 medium supplemented with 10% (v/v) FBS and  $\beta$ -mercaptoethanol were cultured for 10 days at 37°C at a density of  $5 \times 10^6$  cells/mL in the presence of MGM-5 (provided by S. Nagata) as a source of granulocyte macrophage colony-stimulating factor (GM-CSF).

#### Co-assembly sample preparation

The stock solutions of conjugates and cholicamide were in DMSO at 10 mM. To prepare a co-assembly mixture with a fixed total final concentration of 10 mM, conjugates and cholicamide were mixed at 10 mM according to the following chart.

| The molar percentage of conjugate in co-assembly | Conjugate ( $\mu$ L, 10 mM) | Conjugate ( $\mu$ L, 10 mM) |
|--------------------------------------------------|-----------------------------|-----------------------------|
| Cholicamide (1)                                  | 0                           | 100                         |
| 10% conjugate@1                                  | 10                          | 90                          |
| 20% conjugate@1                                  | 20                          | 80                          |
| 30% conjugate@1                                  | 30                          | 70                          |
| 40% conjugate@1                                  | 40                          | 60                          |
| 50% conjugate@1                                  | 50                          | 50                          |
| 70% conjugate@1                                  | 70                          | 30                          |
| 90% conjugate@1                                  | 90                          | 10                          |
| conjugate                                        | 100                         | 0                           |

#### Dynamic light scattering (DLS) measurement

Each conjugate or mixture of the conjugate and cholicamide was dissolved in cell culture media (DMEM+ 10% FBS + 1% P/S) or phosphate buffers and incubated under room temperature for 10 min. The z-average sizes, derived count rates, and  $\zeta$ -potential were measured by Malvern Dynamic Light Scattering Spectrophotometer (Zetasizer Nano 1600) at 50  $\mu$ M (final concentration) at 25°C. All measurements were set to an auto-attenuation mode at 25°C, and data were analyzed from at least 10 acquisitions /measurement.

#### Confocal microscopic observation

Confocal microscopic images were captured with a CV1000-SP130 (Cell voyager CV1000, Yokogawa Electrical Corporation.) In Fig. 2B, conjugate 3-Flag (50 or 100  $\mu$ M) was dissolved in H<sub>2</sub>O or PBS, and incubated overnight in a 96-well plate after adding Nile Red (15  $\mu$ M) or fluorescent antibody of Flag (1  $\mu$ L, 10  $\mu$ g/mL, Sigma-Aldrich, A9594). For Fig. 3B, 4-PEG-rhodamine@1 was dissolved in H<sub>2</sub>O and incubated overnight at room temperature before performing the confocal microscopic observation. In Fig. S5B, the co-assembly or cholicamide (1) (50  $\mu$ M) was dissolved in H<sub>2</sub>O in a 96-well plate, stained with Nile Red (15  $\mu$ M), and incubated overnight at room temperature. Images were captured at 561 nm. For Fig. S6B, cholicamide (1) or 2-OVAp@1 was dissolved in DMEM containing 1.25%FBS. After 30 min, 1  $\mu$ L FITC-streptavidin (Biolegend, 405202, 0.5mg/mL) was added to each sample. Images were captured after overnight incubation at 37°C.

### Co-localization experiment

CellLight™ Early Endosomes-GFP or CellLight™ Late Endosomes-GFP (Invitrogen, C10586 and C10588) were added to HEK293 cells following the protocol provided by the manufacturer, respectively. After incubating at 37°C for 24 h, the cells were incubated with 20% 4-PEG-rhodamine@1 (50 µM) at 37°C. After 4 h, the cells were washed with PBS 3 times and stained with Hoechst 33342 (1:1000). Images were captured by confocal microscopy.

### Solid-phase peptide synthesis

Peptides were prepared through solid-phase peptide synthesis using Rink Amide MBHA resin (Novabiochem, 431041-83-7). The resin was soaked in DCM at room temperature overnight before use. Fmoc protecting group was removed with 10% piperidine in DMF at room temperature shaking at 300 rpm for 30 min. After deprotection, the reaction solution was removed by vacuum, and resin was washed three times with DMF and DCM, respectively, after each step. Amino acids were dissolved in a 0.45 M coupling reagent (HBTU and HOBT in DMF) and 0.9 M DIPEA in NMP in a 1:1 v/v ratio. The resin was treated with an amino acid solution for 1 h at room temperature shaking at 300 rpm. After completion of the synthesis, the resin was dried under vacuum, transferred to a round-bottom flask, and treated with TFA for 1 h for cleaving the peptide. The resulting solution was filtered and evaporated for the removal of excess TFA. The peptide was precipitated with ice-cold Et<sub>2</sub>O and centrifuged to the bottom of the centrifuge tube at 145,000 rpm at 4°C. The precipitates were dried under vacuum after removing the supernatants, purified with HPLC, and lyophilized to give a white powder.

### Enzyme-linked immunosorbent assay (ELISA)

For the stimulation of RAW264.7 cells, 10 000 cells/well were seeded onto a 96-well tissue culture plate in DMEM containing 10% FBS at 37°C for 24 h. The medium was then replaced with a solution of compounds in DMEM containing 10% FBS (final concentration of DMSO: 1%). DMSO 1% (v/v) was used as the negative control. After 24 h, the media were centrifuged at 3000 rpm (4°C), collected, and stored at -30°C or directly assayed. The cytokines (IL-6 and TNF-α) in the supernatants were quantified by ELISA (R&D Systems). All assays were performed in triplicates or duplicates following the protocol provided by the manufacturer.

### Antigen presenting efficiency assay

Antigen presenting efficiency was analyzed by flow cytometry. Flow cytometry was performed on a BD FACS Aria II flow cytometer, and the result was analyzed by FlowJo V10. BMDCs were seeded to a 6-well plate at 1x10<sup>6</sup>/well and incubated with compounds for 24 h at 37°C. For Fig. 5, the cells were treated with 30 µM 2-OVAp-B@1 (30%, 50%, 70%, or OVAp-B alone) or OVAp-B (9, 15, 21, or 30 µM) simply mixed with 30 µM cholicamide (indicated as 30-70% OVAp-B+1). The cells were collected by centrifugation at 1500 rpm, washed twice with PBS buffer, and incubated with 100 µL of 2.5 µg/mL FITC-streptavidin (Biolegend, 405202) in FACS buffer (PBS containing 2% FBS and 0.1% sodium azide) at room temperature for 30 min. After centrifugation at 1500 rpm, the cells were washed three times with the FACS buffer and analyzed by flow cytometry. Samples were triplicated and data were analyzed with FlowJo V10. For Fig. S2D, BMDCs were treated with 2 µg OVA<sub>257-264</sub>, 20% 4-OVA<sub>257-264</sub>@1 (50 µM or 100 µM), 20% 4-PEG-OVA<sub>257-264</sub>@1 (50 µM or 100 µM), 30% 4-OVA<sub>257-264</sub>@1 (30 µM), or 30% 4-PEG-OVA<sub>257-264</sub>@1 (30 µM) for 24 h, collected by centrifugation at 1500 rpm, washed twice with PBS buffer, and incubated with 0.5 µg PE H2K<sup>b</sup> bound SIINFEKL antibody (BioLegend, 141603) in 100 µL FACS buffer.

### Cryo-transmission electron microscopy (Cryo-TEM)

70% of 2-OVAp@1 was dissolved in H<sub>2</sub>O at 50 µM and used for observation. Cryo-TEM images were obtained with a JEOL JEM-2100F (G5) microscope operated at the acceleration voltage of 200 kV and measured at liquid helium temperature (4.2 K).

### Field Emission Scanning Electron Microscope (FESEM)

70% of 2-OVAp@1 was dissolved in H<sub>2</sub>O at 50 µM. The resulting mixture was transferred to a culture dish and placed in the hood, and the water was then gently evaporated at 25°C. After evaporation, a white powder was scratched from the bottom of the culture dish, drop-casted over carbon stubs, and sputtered with gold/palladium for 180 s. Images were captured at a constant voltage of 15.0 kV (EI) using SEM JSM7500 (JEOL Ltd.).

### Stability of assemblies in various pH phosphate buffers

Phosphate buffers at various pH were prepared according to the following procedure. Phosphoric acid (0.83

mL) and sodium hydrogen diphosphate (3.08 g) was dissolved in 50 mL H<sub>2</sub>O, respectively. To prepare pH 2 buffer, 36.25 mL of the phosphoric solution and 13.75 mL of the sodium hydrogen diphosphate solution were mixed. For pH 4 buffer, 5.04 g disodium hydrogen phosphate and 3.01 g of potassium dihydrogen phosphate were dissolved in sufficient water to produce a 1000 mL solution. The pH of the solution was then adjusted with glacial acetic acid to pH 4. The pH 6 and 8 phosphate buffers were prepared by mixing 0.2 M sodium dihydrogen phosphate (solution A) and 0.2 M disodium hydrogen phosphate (solution B) as shown in the following chart.

| pH | Solution A (mL) | Solution B (mL) |
|----|-----------------|-----------------|
| 6  | 8.77            | 1.23            |
| 8  | 0.53            | 9.47            |

## Chemical synthesis

### General procedure

The solvents and chemicals for chemical synthesis were used as purchased with no further purification. All solvents and chemicals for chemical synthesis were purchased from Wako Pure Chemicals, TCI, or Sigma-Aldrich. Analytical thin-layer chromatography (TLC) was performed on Merck 60G silica gel glass plates coated with fluorescent indicator F254. Silica gel column chromatography was performed using silica gel 60, spherical, neutra 75  $\mu$ m (Nacalai Tesque). Preparative layer plates (PLC Silica gel 60 F254) were purchased from Merck, and flash column chromatography was employed with Silica gel 60 (spherical) purchased from Nacalai Tesque. Mass spectral data were recorded on a Shimadzu LCMS-2010EV quadrupole mass spectrometer, operating in both positive and negative electrospray ionization modes, m/z range of 200-2000 m/z. High-resolution mass spectra were obtained using a JEOL MStation JMS-700V in FAB mode. Solution <sup>1</sup>H and <sup>13</sup>C NMR spectra were collected by JEOL 300 or 600-MHz JNM-ECP NMR spectrometers or a Bruker 800-MHz NMR spectrometer. High-resolution mass spectra (HRMS) were obtained using a JEOL MStation JMS-700 in FAB mode. Mass spectral checkups were performed using a binary solvent system (A: H<sub>2</sub>O with 0.1% TFA; B: CH<sub>3</sub>CN with 0.1% TFA) with an eluting gradient of 10-95% B (0-5 min), UV detection at 254 nm, 220 nm, and 190 nm, and flow rate at 0.5 mL/min. High-performance liquid chromatography (HPLC) was performed with a Shimadzu LC-2010C.

### General procedure for the amide condensation reaction

To a solution of amine (1.0 eq.) and acid (1.0 eq.) in DMF stirring in the ice bath, HATU (1.5 eq.) was added. After adding DIPEA (2.0 eq.) to the reaction mixture 1h later, the resulting reaction mixture was stirred overnight with temperature generally increasing to room temperature. The reaction mixture was quenched by adding water and extracted with ethyl acetate three times. The organic layer was combined, washed with brine, and dried with anhydrous sodium sulfate. The crude mixture was purified by flash column chromatography with gradient elution (DCM with 10-50% MeOH) to give purified compounds a white solid. The structure and purity of all products were confirmed by <sup>1</sup>H NMR, <sup>13</sup>C NMR, and HRMS-ESI.

#### L-Lysine ethyl ester (Intermediate 1)

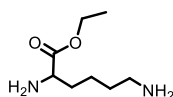

A round bottom flask was charged with lysine (1.8 g) and 13 mL EtOH, cooling with an ice bath. Thionyl chloride (2 mL) was added to the reaction mixture dropwise for 45 min. After completion, the resulting mixture was transferred to an oil bath at 80°C until it become transparent. Excess thionyl chloride and EtOH was removed by evaporation in *vacuo* to give a crude product as white solid. The crude product was used without further purification.

#### N<sup>2</sup>, N<sup>6</sup>-bis((R)-4-((3R,5R,8R,9S,10S,12S,13R,14S,17S)-3,12-dihydroxy-10,13-dimethylhexadecahydro-1H-cyclopenta[a]phenanthren-17-yl)pentanoyl) lysine (Molecule 2)

A round bottom flask was charged with intermediate **1** (1.44 g, 8 mmol) and deoxycholic acid (5.4 g, 16 mmol), and DMF (40 mL). HATU (4.5 g, 12 mmol) was added to the resulting solution at 0°C. After stirring for 1 h, DIPEA (3 mL, 16 mmol) was added to the reaction mixture to react overnight at room temperature. The reaction mixture was extracted with ethyl acetate and washed with brine. The organic layer was combined, dried with MgSO<sub>4</sub>, and condensed by evaporation to give a crude product of intermediate **2**. The crude product was purified with flash chromatography with DCM: MeOH (from 100: 1 to 10:1). The corresponding elution fragment was checked with

LC-MS, concentrated under reduced pressure by rotary evaporation, and dried in vacuo to give a 73% yield of purified intermediate **2** (5.39 g, 5.8 mmol). ESI-LCMS ( $m/z$ ): calc'd for  $[C_{56}H_{95}N_2O_8]^+$   $[M+H]^+$ : 924.71, found 924.67.

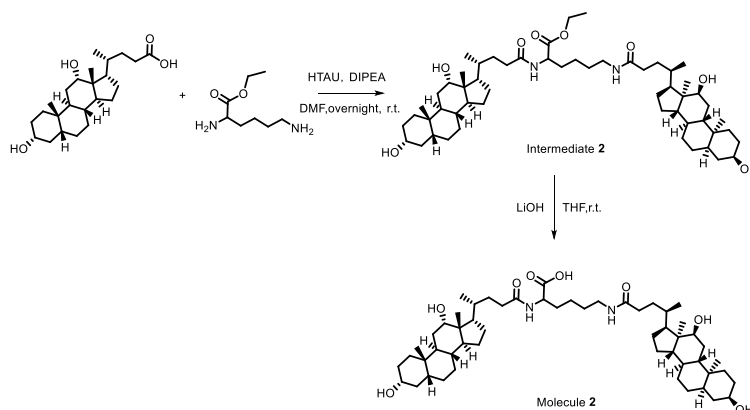

A round bottom flask was charged with intermediate **2** (100 mg, 0.108 mmol) and LiOH (10 mg, 0.432 mmol), and THF (10 mL). 1 mL water was added to the resulting solution at room temperature. The reaction was monitored by TLC staining with PMA to show the compound spot. After completion, THF was removed by evaporation to give a white oily solid. The solid was dissolved in 3 mL water, the pH of the resulting solution was adjusted to pH=2, and white precipitation appeared. Precipitation was collected by filtering to give the crude product of molecule **2** as a white solid (80 mg).  $^1H$ -NMR (600 MHz, DMSO- $d_6$ )  $\delta$ : 7.9 (d, 2H,  $J$  = 1.8 Hz), 7.75 (t, 2H, 5.4 Hz), 4.07-4.11 (m, 2H), 3.78 (d, 2H,  $J$  = 3.0 Hz), 3.33-3.38 (m, 2H), 2.93-3.03 (m, 2H), 1.91-2.24 (m, 4H), 1.72-1.82 (m, 7H), 1.62-1.66 (m, 7H), 1.44-1.57 (m, 5H), 1.13-1.36 (m, 24H), 0.84-1.07 (m, 18H), 0.58 (t, 6H,  $J$  = 3.6 Hz);  $^{13}C$ -NMR (151 MHz, DMSO- $d_6$ )  $\delta$ : 12.33, 16.79, 16.98, 22.89, 23.40, 25.98, 26.00, 26.86, 27.06, 27.09, 28.64, 30.11, 30.03, 30.05, 30.62, 30.71, 31.55, 31.63, 32.11, 32.43, 32.80, 33.70, 34.86, 37.97, 38.43, 41.48, 45.85, 45.86, 45.87, 46.05, 46.15, 47.34, 51.54, 54.81, 69.82, 70.87, 70.89, 70.90, 172.30, 173.68, 174.83; ESI-LCMS ( $m/z$ ): calc'd for  $[C_{54}H_{91}N_2O_8]^+$   $[M+H]^+$ : 894.68, found 894.69.

(4R,4'R)-N,N'-(6-oxo-6-((2-(N-(prop-2-yn-1-yl)benzamido)ethyl)amino)hexane-1,5-diyl)bis(4-((3R,5R,8R,9S,10S,12S,13R,14S,17S)-3,12-dihydroxy-10,13-dimethylhexadecahydro-1H-cyclopenta[a]phenanthren-17-yl)pentanamide) (Molecule **3**)

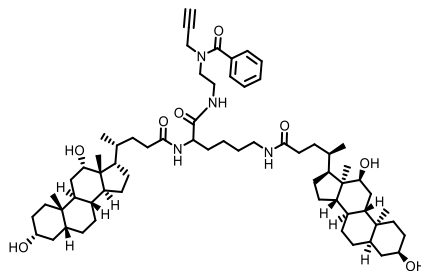

Molecule **3** was synthesized according to the general amine condensation reaction mentioned above. A round bottom flask was charged with N-(2-aminoethyl)-N-(prop-2-yn-1-yl) benzamide (17.5 mg, 0.1 mmol) and molecule **2** (95 mg, 0.1 mmol), and DMF (5 mL). HATU (40 mg, 0.15 mmol) was added to the resulting solution at 0°C. After stirring for 1 h, DIPEA (39  $\mu$ L, 0.2 mmol) was added to the reaction mixture to react overnight at room temperature. The reaction mixture was extracted with ethyl acetate and washed with brine. The organic layer was combined, dried with  $MgSO_4$ , and condensed by evaporation to give a crude product of molecule **3**. The crude product was purified with flash chromatography with DCM: MeOH (from 100: 1 to 10:1). The corresponding elution fragment was checked with LC-MS, concentrated under reduced pressure by rotary evaporation, and dried in vacuo to give a 37% yield of purified molecule **3** (40 mg).  $^1H$ -NMR (600 MHz, DMSO- $d_6$ )  $\delta$ : 8.16 (s, 1H), 7.88 (s, 1H), 7.71 (t, 1H,  $J$  = 5.4 Hz), 7.44 (br, 3H), 7.36 (s, 1H), 4.47 (d, 2H,  $J$  = 3.0), 4.10-4.34 (m, 4H), 4.00 (s, 1H), 3.78 (s, 2H), 3.16 (d, 1H,  $J$  = 4.2 Hz), 2.91-3.02 (m, 2H), 1.99-2.19 (m, 4H), 1.7-1.82 (m, 7H), 1.44-1.66 (m, 12H), 0.8-1.4 (m, 42H), 0.58 (t, 6H,  $J$  = 8.4 Hz);  $^{13}C$ -NMR (151 MHz, DMSO- $d_6$ )  $\delta$ : 12.32, 16.96, 16.99, 22.99, 23.40, 26.00, 26.87, 27.08, 28.50, 28.73, 30.11, 31.48, 31.63, 32.20, 32.43, 32.80, 33.70, 34.94, 35.02, 35.53, 36.17, 38.05, 41.48, 45.85, 46.10, 47.34, 48.48, 69.82, 70.89, 126.44, 128.29, 129.61, 135.63, 170.31, 172.13, 172.26, 172.62; ESI-LCMS ( $m/z$ ): calc'd for  $[C_{66}H_{103}N_4O_8]^+$   $[M+H]^+$ : 1079.77, found 1079.87.

(4R,4'R)-N,N'-(6-oxo-6-(prop-2-yn-1-ylamino)hexane-1,5-diyl)bis(4-((3R,5R,8R,9S,10S,12S,13R,14S,17S)-3,12-dihydroxy-10,13-dimethylhexadecahydro-1H-cyclopenta[a]phenanthren-17-yl)pentanamide) (Molecule 4)

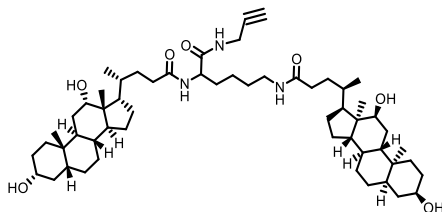

Molecule 4 was synthesized according to the general amine condensation reaction mentioned above. A round bottom flask was charged with propargyl amine (7.49 mg, 0.1293 mmol) and molecule 2 (100 mg, 0.1175 mmol), and DMF (5 mL). HATU (73 mg, 0.194 mmol) was added to the resulting solution at 0°C. After stirring for 1 h, DIPEA (40 µL, 0.235 mmol) was added to the reaction mixture to react overnight at room temperature. The reaction mixture was extracted with ethyl acetate and washed with brine. The organic layer was combined, dried with MgSO<sub>4</sub>, and condensed by evaporation to give a crude product of molecule 4. The crude product was purified with flash chromatography with DCM: MeOH (from 100: 1 to 10:1). The corresponding elution fragment was checked with LC-MS, concentrated under reduced pressure by rotary evaporation, and dried in vacuo to give a 48.4% yield of purified molecule 4 (53 mg). <sup>1</sup>H-NMR (600 MHz, DMSO-*d*<sup>6</sup>) δ: 8.31 (t, 1H, *J* = 5.4 Hz), 7.87 (d, 1H, *J* = 8.4 Hz), 7.719 (t, 1H, *J* = 5.4 Hz), 4.48 (dd, *J*<sub>1</sub> = 1.2 Hz, *J*<sub>2</sub> = 3.0 Hz), 4.14-4.22 (m, 3H), 3.82-3.83 (m, 3H), 3.786 (s, 1H), 3.090 (t, 1H, *J* = 5.4 Hz), 2.92-3.01 (m, 2H), 1.90-2.23 (m, 4H), 1.74-1.825 (m, 8H), 1.44-1.66 (m, 14H), 1.13-1.36 (m, 26H), 0.84-1.0 (m, 19H), 0.58 (t, 6H, *J* = 8.4 Hz); <sup>13</sup>C-NMR (151 MHz, DMSO-*d*<sup>6</sup>) δ: 12.32, 16.69, 17.00, 22.65, 22.99, 23.40, 26.00, 26.87, 27.09, 27.75, 28.49, 28.68, 30.11, 31.50, 31.53, 31.63, 32.23, 32.43, 32.80, 33.71, 34.95, 35.02, 35.54, 36.17, 38.06, 39.91, 41.48, 45.85, 45.86, 45.87, 46.05, 46.10, 47.34, 51.96, 69.82, 70.88, 72.82, 80.98, 171.65, 172.29, 172.62; ESI-LCMS (*m/z*): calc'd for [C<sub>57</sub>H<sub>94</sub>N<sub>3</sub>O<sub>7</sub>]<sup>+</sup> [M+H]<sup>+</sup>: 933.71, found 933.75.

#### General procedure for copper-catalyzed azide-alkyne cycloaddition (CuAAC)

To a solution of azide (0.1 mmol), alkyne (0.1 mmol) in MeOH: THF (5:1, 10 mL), 1M aqueous CuSO<sub>4</sub> (0.3 mmol) and 1M aqueous sodium ascorbate (0.15 mmol) were added. The resulting mixture was stirred overnight. After reaction completion, precipitation was formed, collected by centrifugation in a centrifuge tube, and purified by HPLC. **4-PEG-rhodamine** <sup>1</sup>H-NMR (600 MHz, DMSO-*d*<sup>6</sup>) δ: 8.419 (d, 1H, *J* = 1.8 Hz), 8.343 (t, 1H, *J* = 5.4 Hz), 8.063 (t, 1H, *J* = 6.0 Hz), 7.771 (dd, 1H, *J*<sub>1</sub> = 1.8 Hz, *J*<sub>2</sub> = 6.0 Hz), 7.850 (d, 1H, *J* = 7.8 Hz), 7.834 (s, 1H), 7.703 (t, 1H, *J* = 6.0 Hz), 7.462 (d, 1H, *J* = 7.8 Hz), 7.04 (dd, 2H, *J*<sub>1</sub> = 6.0 Hz, *J*<sub>2</sub> = 9.6 Hz), 6.982 (s, 1H), 6.966 (s, 1H), 6.937 (d, 2H, *J* = 2.4 Hz), 4.476 (t, 2H, *J* = 5.4 Hz), 4.271 (d, 1H, *J* = 5.4 Hz), 3.785 (t, 2H, *J* = 5.4 Hz), 3.673-3.603 (m, 8H), 3.521-3.456 (m, 10H), 3.02 (q, 2H, *J* = 5.4 Hz), 2.976-2.955 (m, 2H), 2.180 (t, 1H, *J* = 7.2 Hz), 1.817-1.462 (m, 10H), 1.350-0.835 (m, 70H), 0.573 (d, 6H, *J* = 4.2 Hz); <sup>13</sup>C-NMR (151 MHz, DMSO-*d*<sup>6</sup>) δ: 12.30, 13.85, 16.992, 16.956, 21.99, 22.40, 22.71, 22.98, 23.33, 23.40, 24.37, 26.00, 26.87, 27.08, 28.428, 28.483, 28.594, 28.624, 28.702, 28.789, 28.8668, 28.893, 28.092, 28.921, 28.935, 30.11, 31.502, 31.541, 31.625, 32.24, 32.61, 32.80, 33.54, 33.70, 34.10, 34.913, 34.956, 35.016, 35.033, 35.35, 35.54, 36.17, 38.06, 39.93, 40.89, 41.48, 42.34, 45.14, 45.84, 46.08, 46.09, 47.32, 49.18, 52.20, 68.66, 69.01, 69.412, 69.530, 69.554, 69.564, 69.817, 70.89, 70.96, 79.38, 113.35, 113.53, 122.94, 125.58, 126.48, 130.47, 132.55, 132.88, 141.47, 144.60, 147.84, 154.90, 156.99, 157.34, 157.70, 157.94, 158.19, 158.34, 171.33, 171.83, 172.27, 172.64, 174.10.

#### MS spectrum

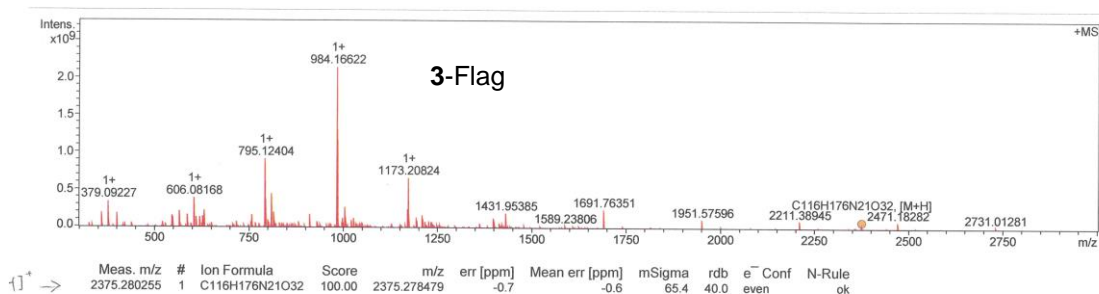

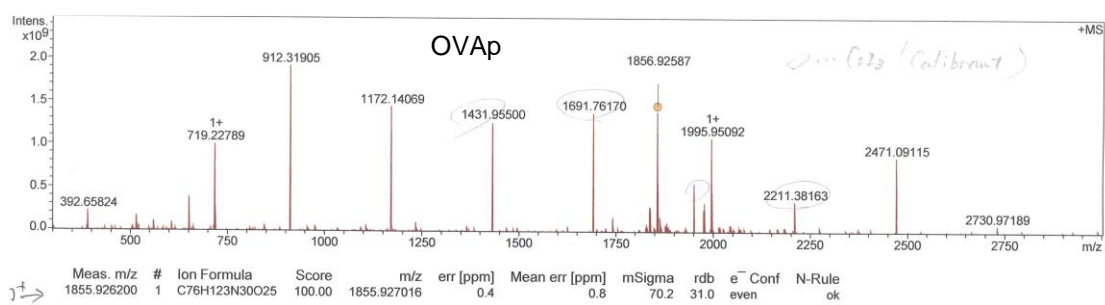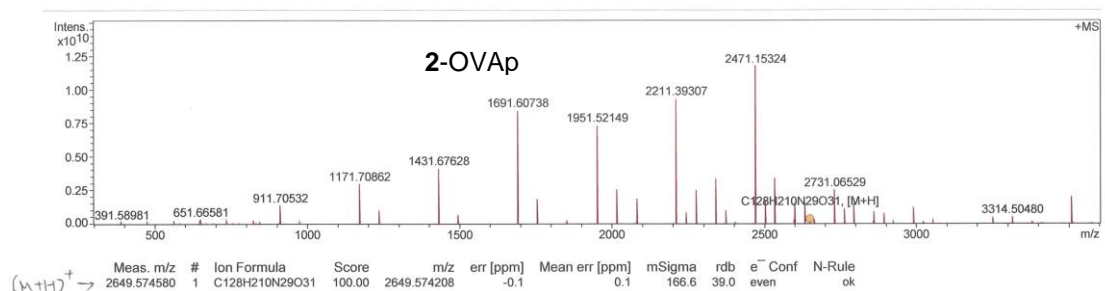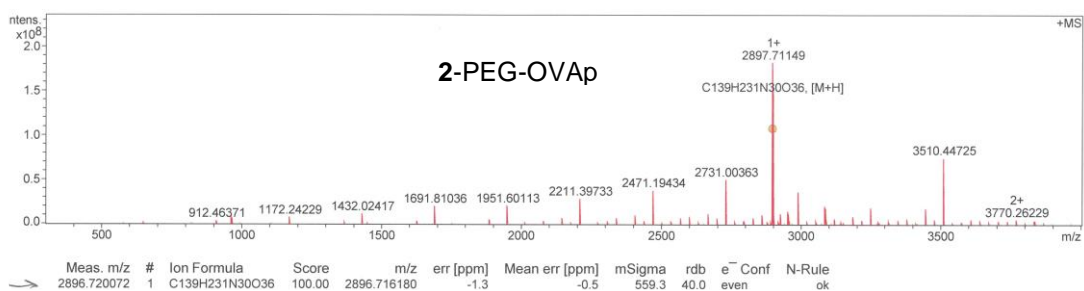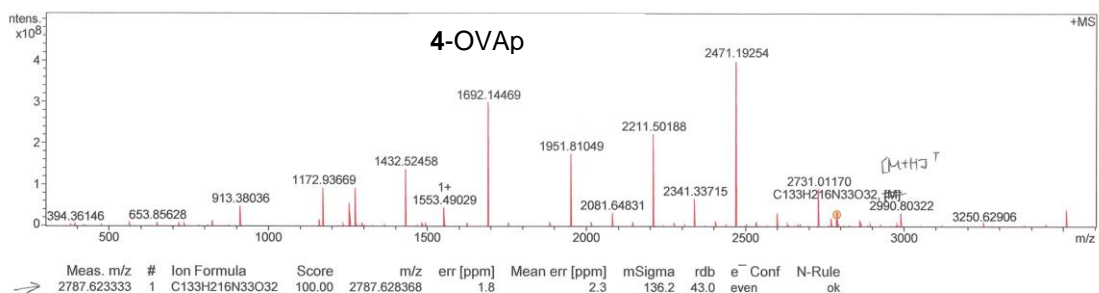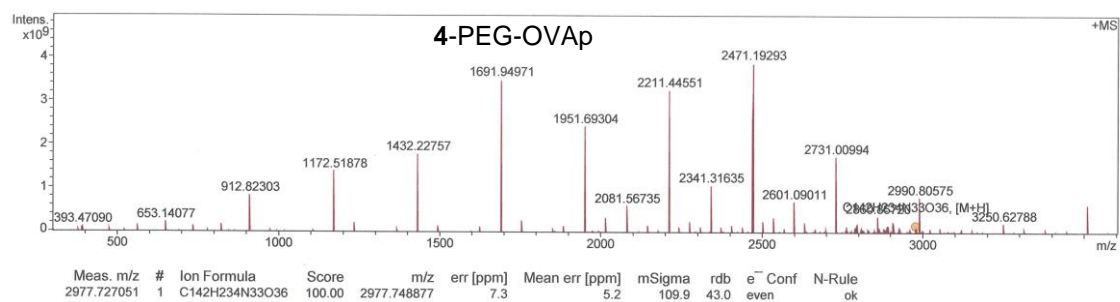

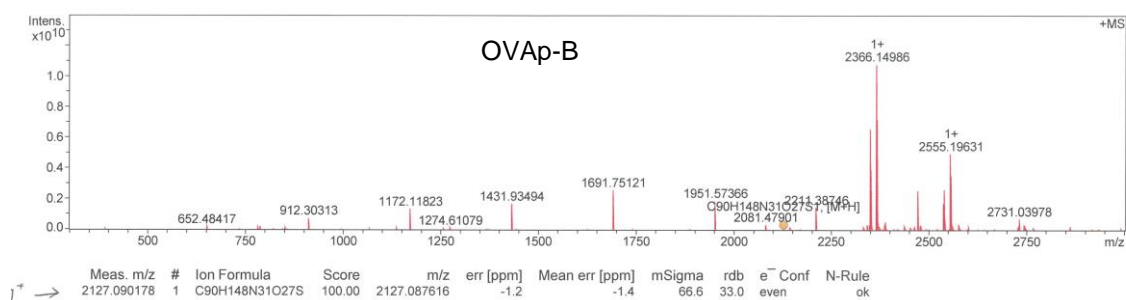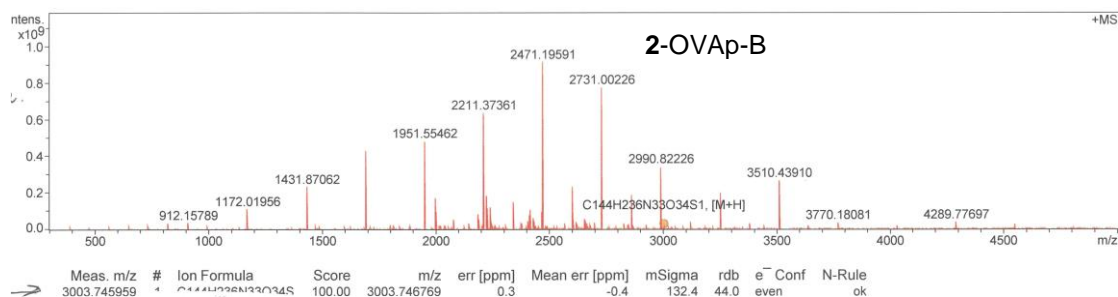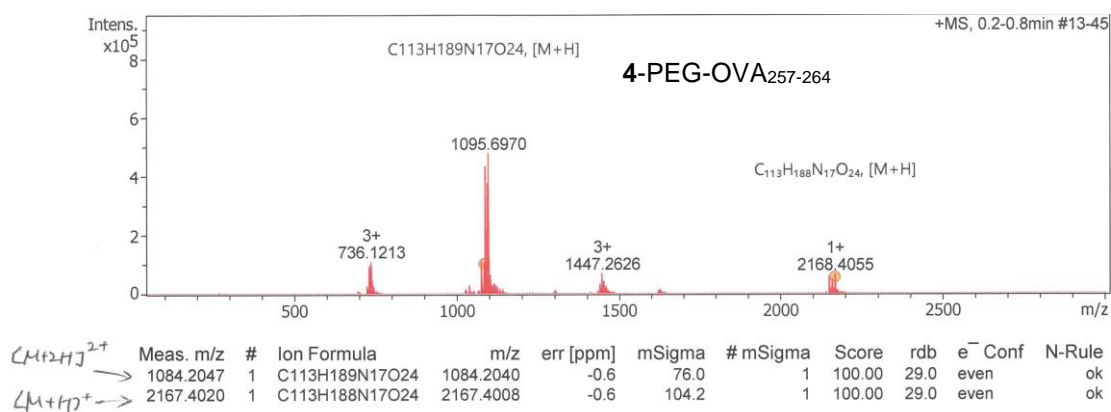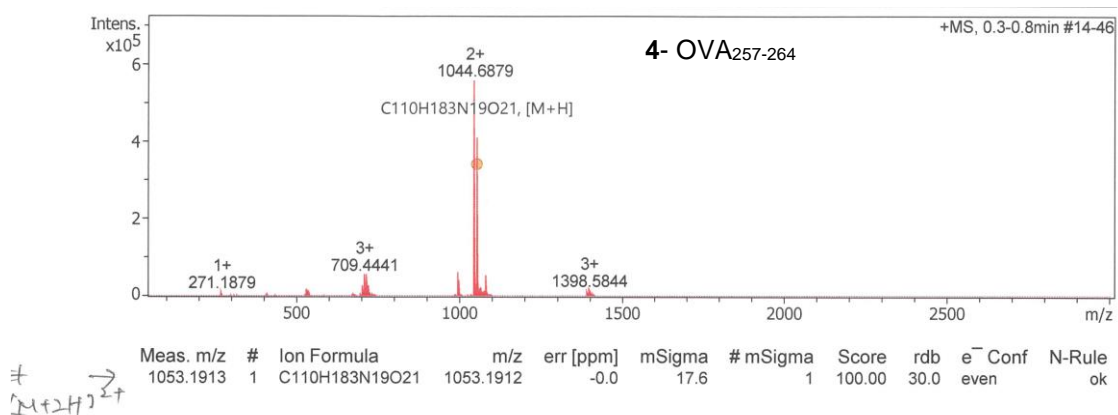

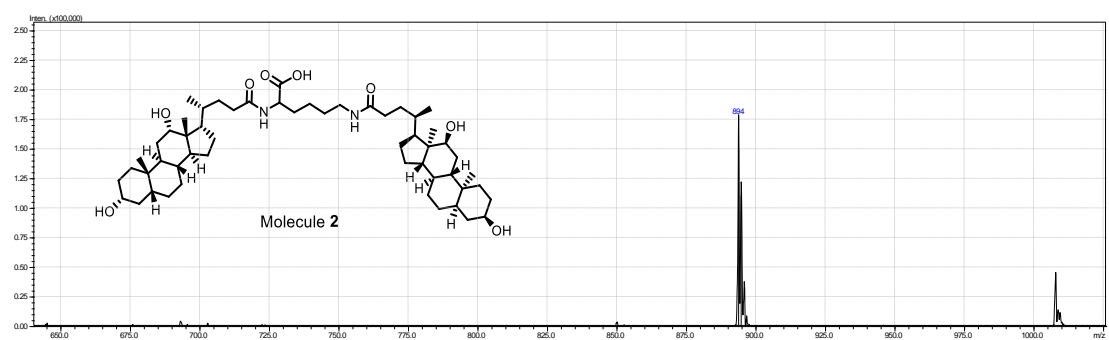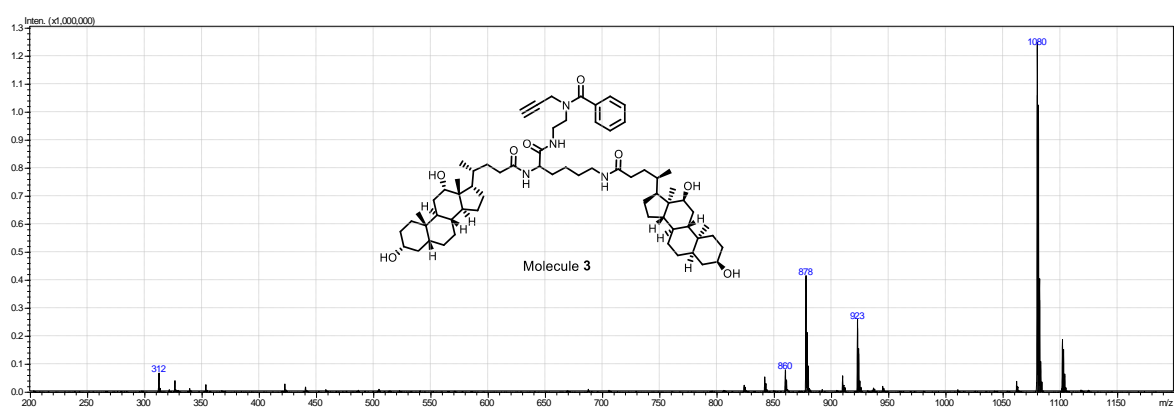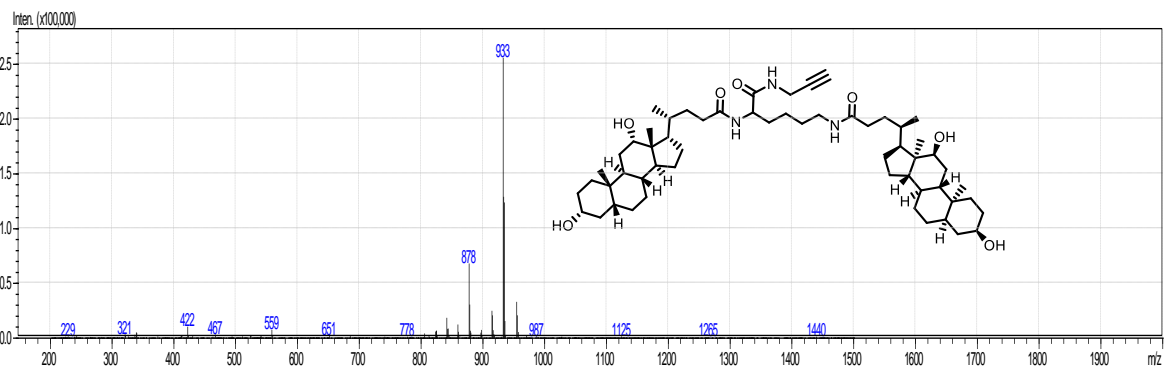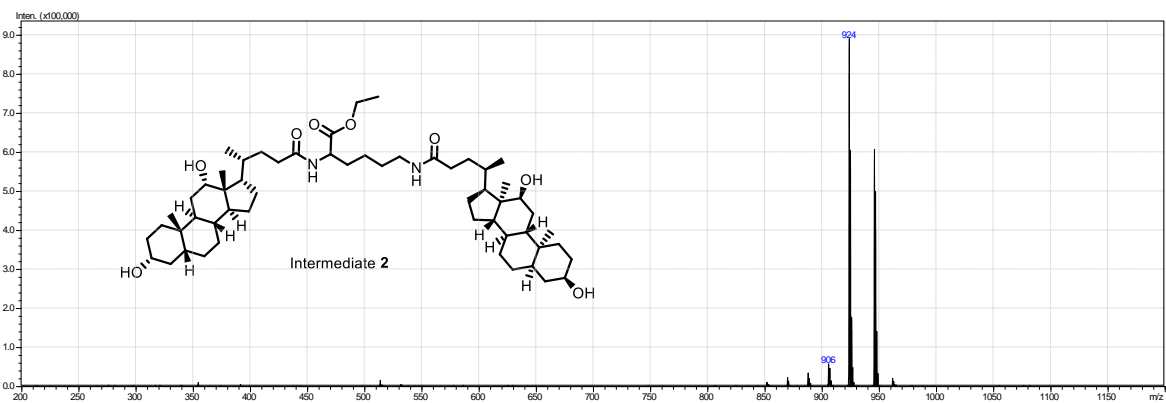

NMR spectra

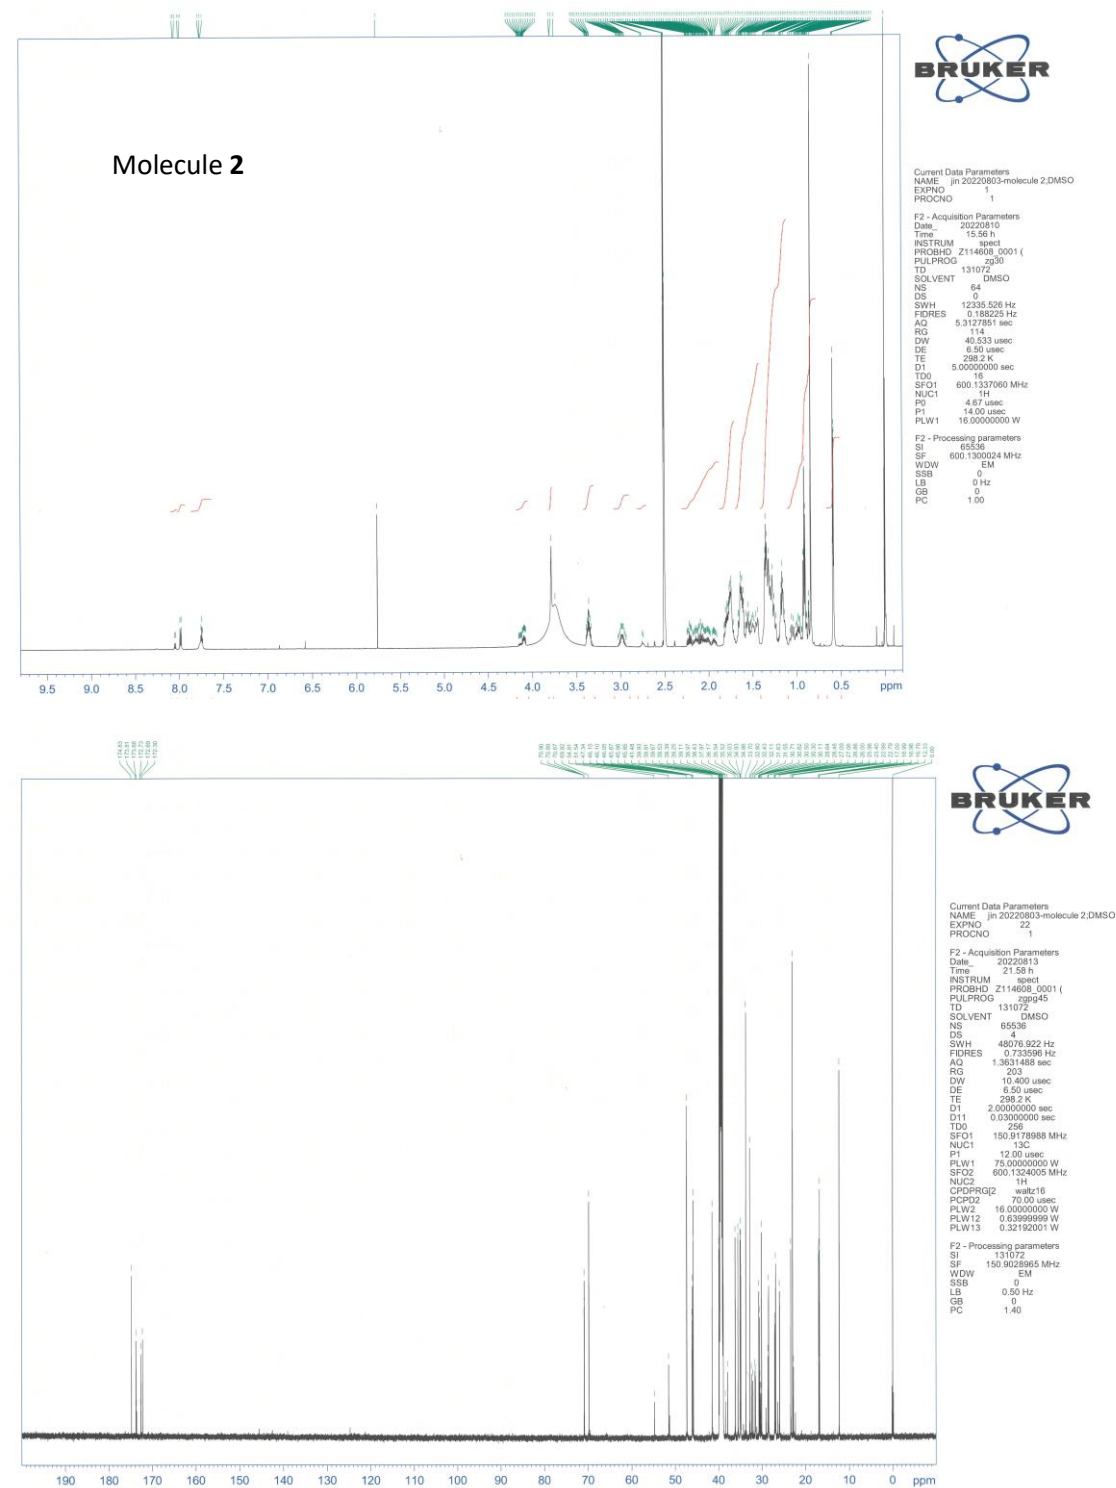

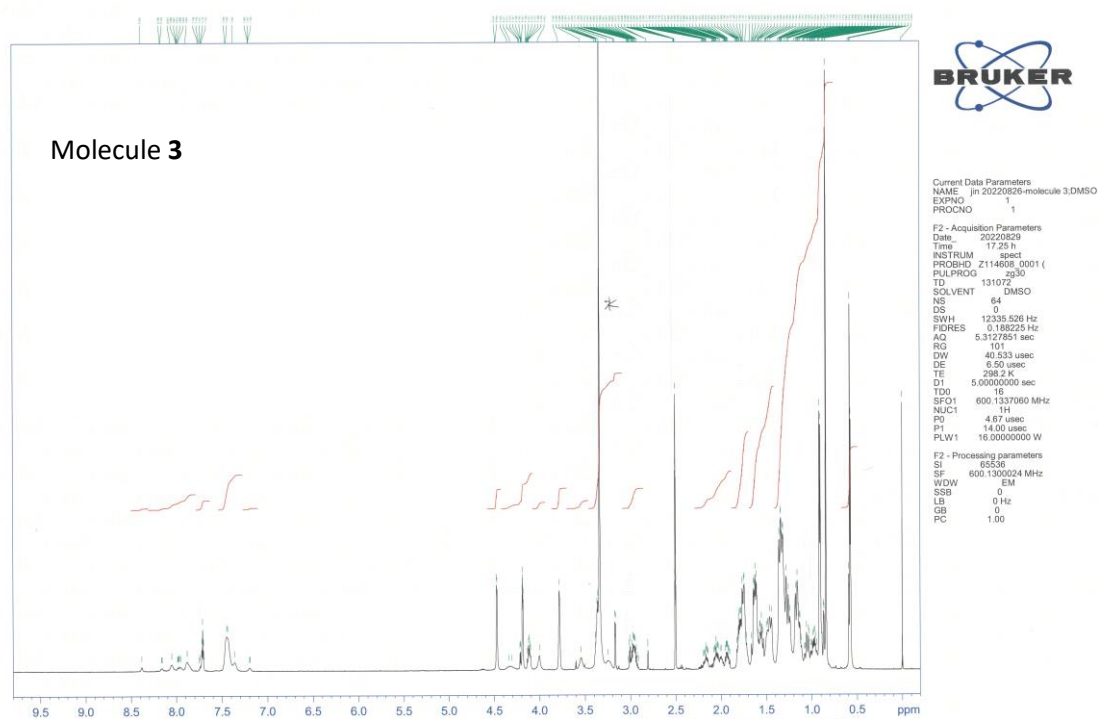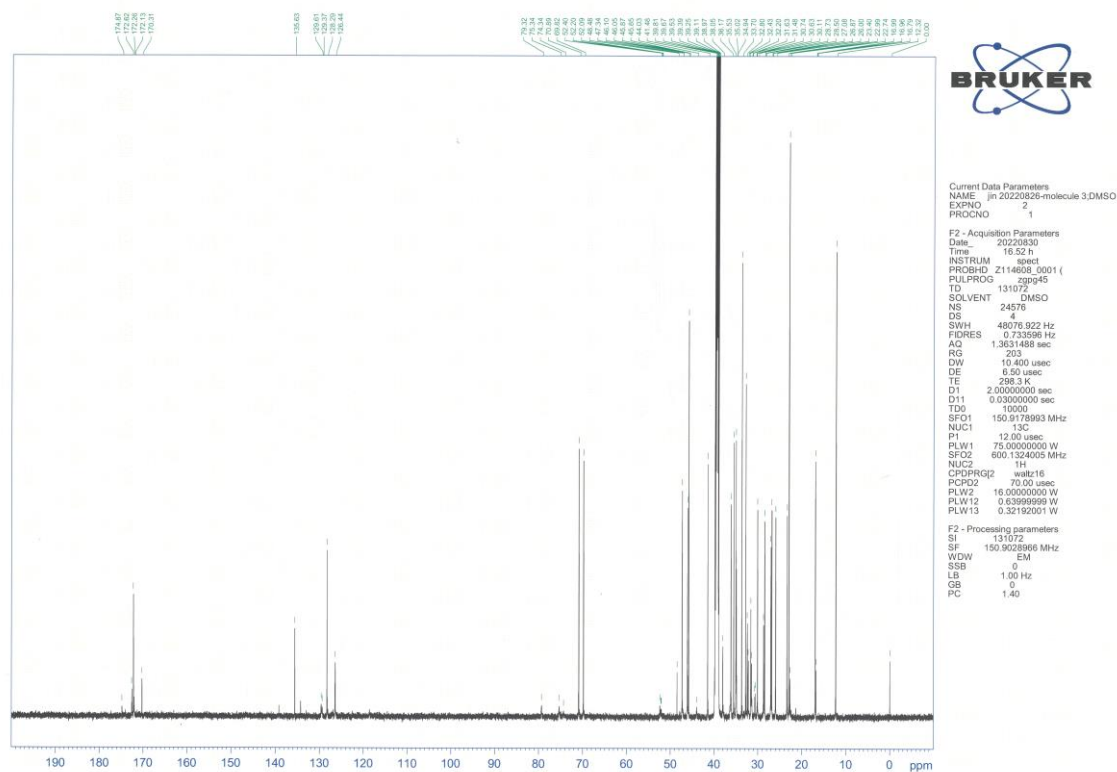

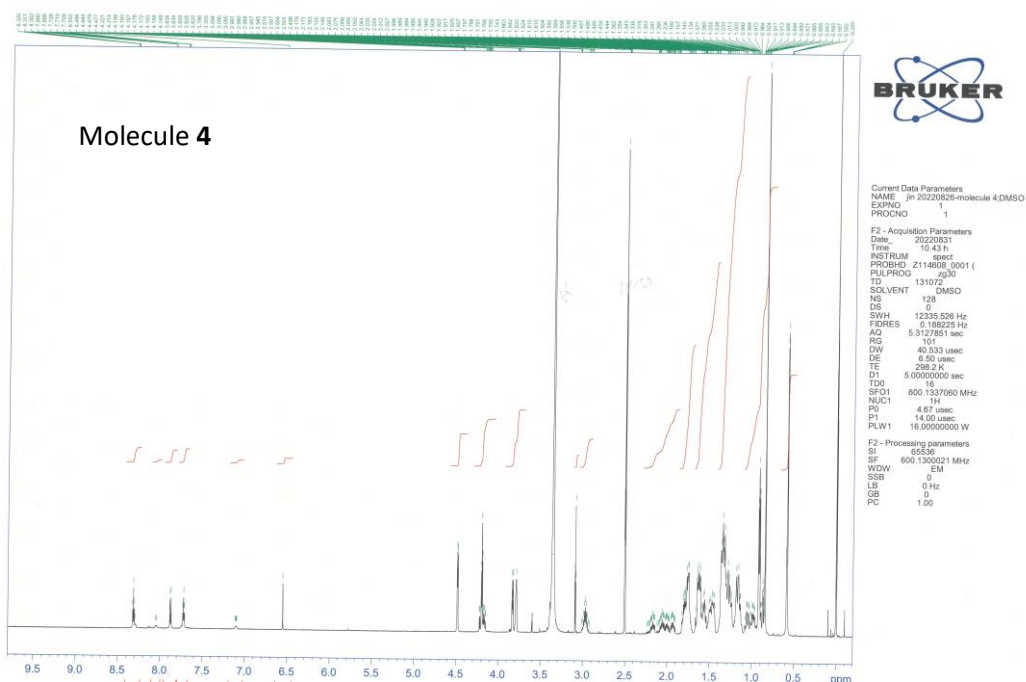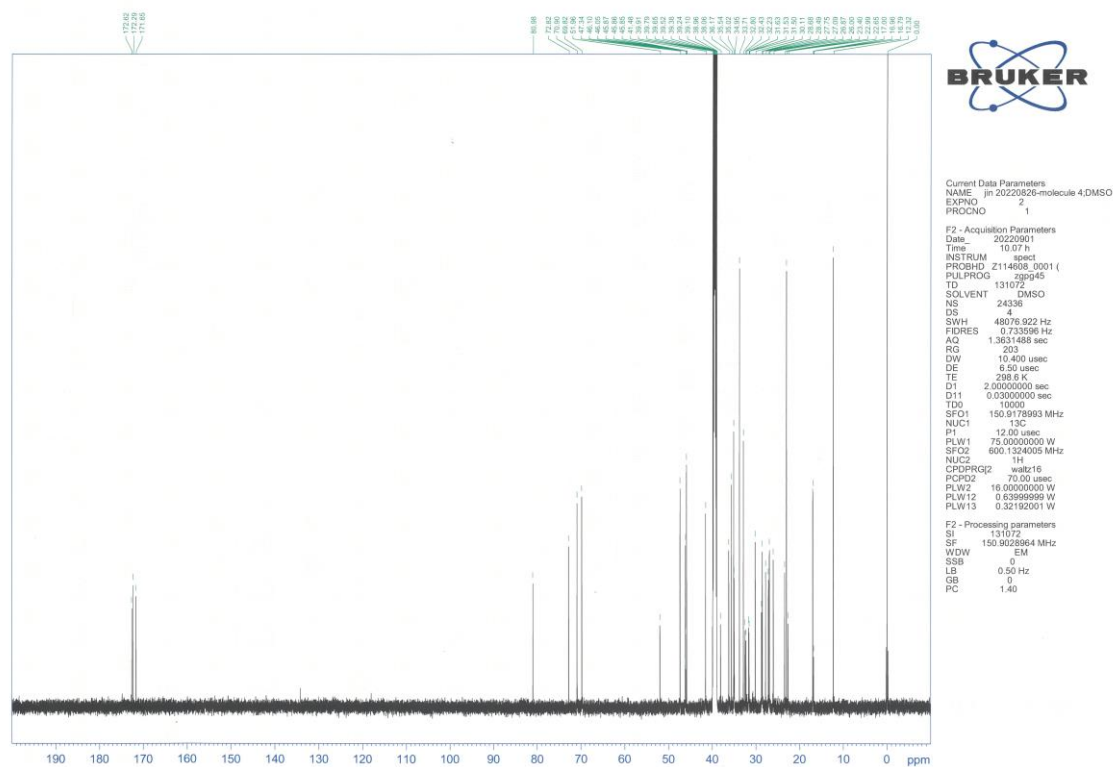

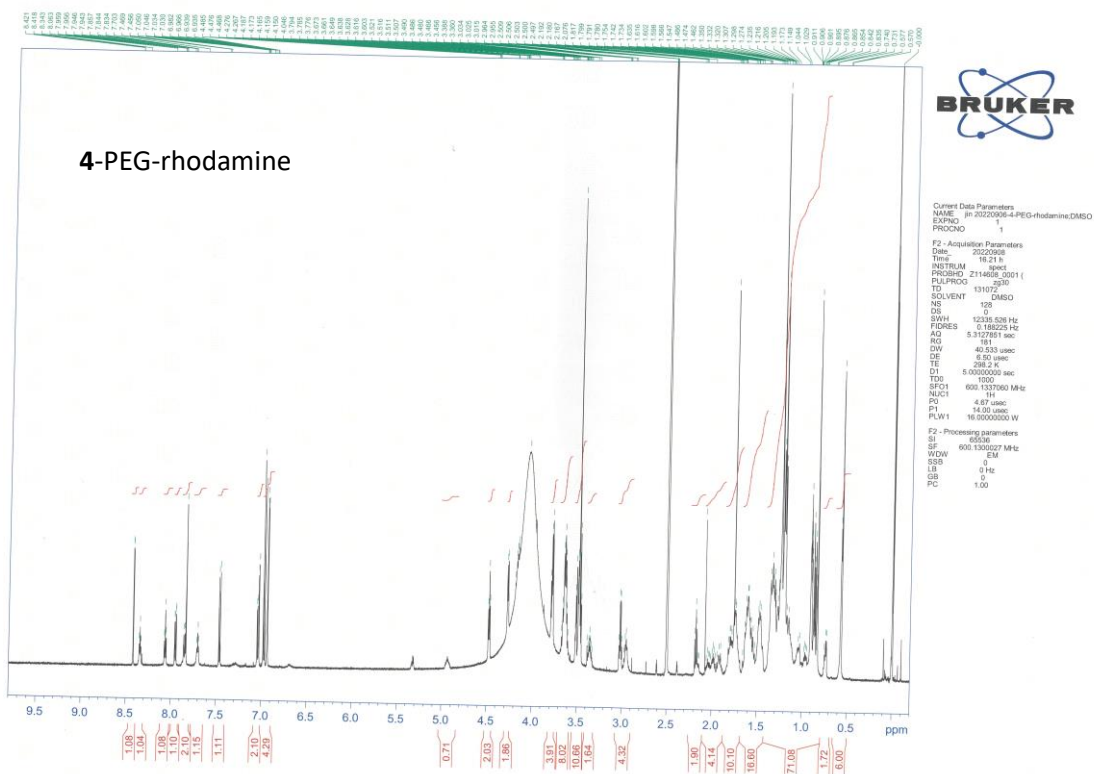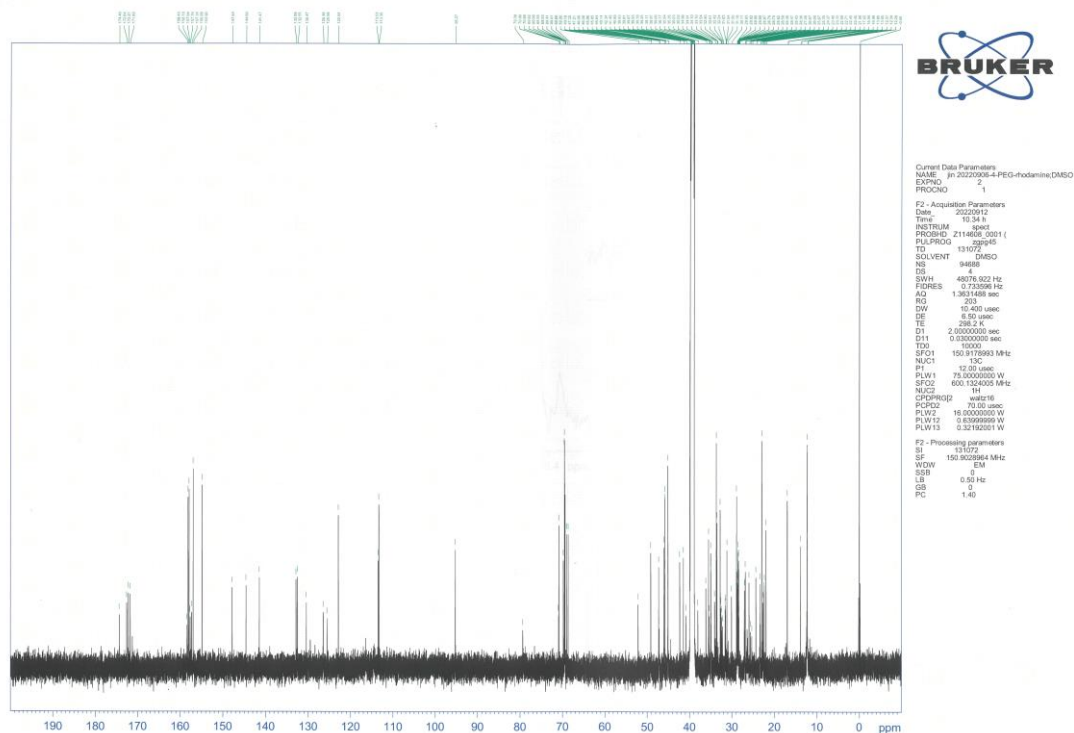

## Purity analysis

### Molecule 2

サンプル名 : 20221003 Molecule 2-0  
 サンプルID : 20221003 Molecule 2-0  
 データファイル : 20221006 Molecule 2-1.kd  
 メソッドファイル : Cholic acid Derivatives\_project.purity\_check.km  
 バッチファイル :  
 バイアル番号 : -1  
 注入量 : 50 uL  
 サンプルタイプ : 未知  
 分析日時 : 2022/10/06 18:36:43  
 解析日時 : 2022/10/06 19:23:25  
 分析者 : System Administrator  
 解析者 : System Administrator

#### <クロマトグラム>

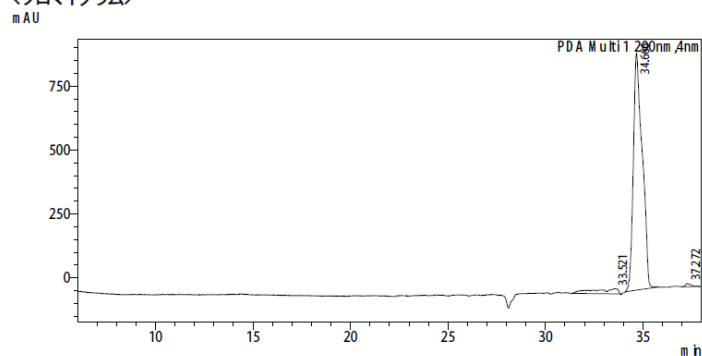

#### <ピークレポート>

| ピーク# | 保持時間   | 面積       | 高さ     | 面積%     |
|------|--------|----------|--------|---------|
| 1    | 33.521 | 1758394  | 19204  | 5.582   |
| 2    | 34.666 | 29501291 | 926656 | 93.653  |
| 3    | 37.272 | 241045   | 12309  | 0.765   |
| 合計   |        | 31500730 | 958169 | 100.000 |

### Molecule 3

サンプル名 : Molecule 3  
 サンプルID : Molecule 3  
 データファイル : Molecule 3  
 メソッドファイル : Cholic acid Derivatives\_project.purity\_check.km  
 バッチファイル :  
 バイアル番号 : -1  
 注入量 : 50 uL  
 サンプルタイプ : 未知  
 分析日時 : 2022/10/03 17:41:40  
 解析日時 : 2022/10/05 12:15:03  
 分析者 : System Administrator  
 解析者 : System Administrator

#### <クロマトグラム>

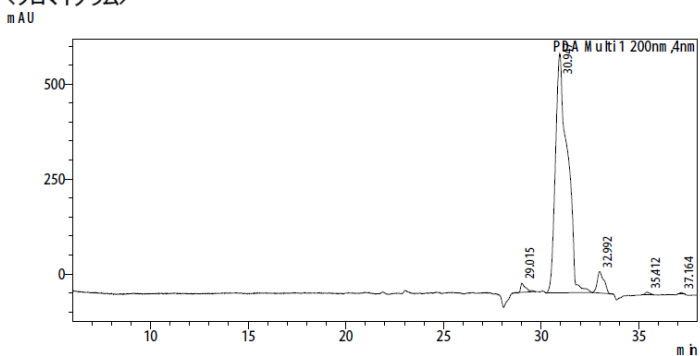

#### <ピークレポート>

| ピーク# | 保持時間   | 面積       | 高さ     | 濃度     | 面積%     |
|------|--------|----------|--------|--------|---------|
| 1    | 29.015 | 426153   | 24173  | 1.476  | 1.476   |
| 2    | 30.947 | 26931994 | 631125 | 93.260 | 93.260  |
| 3    | 32.992 | 1349854  | 56562  | 4.674  | 4.674   |
| 4    | 35.412 | 119286   | 7124   | 0.413  | 0.413   |
| 5    | 37.164 | 51050    | 4136   | 0.177  | 0.177   |
| 合計   |        | 28878337 | 723119 |        | 100.000 |

Molecule 4

<サンプル情報>

サンプル名 : 20221006 Molecule 4  
サンプルID : 20221006 Molecule 4  
データファイル : 20221006 Molecule 4  
メソッドファイル : Cholic acid Derivatives\_project.purity\_check.km  
バッチファイル :  
バイアル番号 : -1  
注入量 : 50 uL  
分析日時 : 2022/10/06 10:07:11  
解析日時 : 2022/10/06 11:05:31  
サンプルタイプ : 未知  
分析者 : System Administrator  
解析者 : System Administrator

<クロマトグラム>

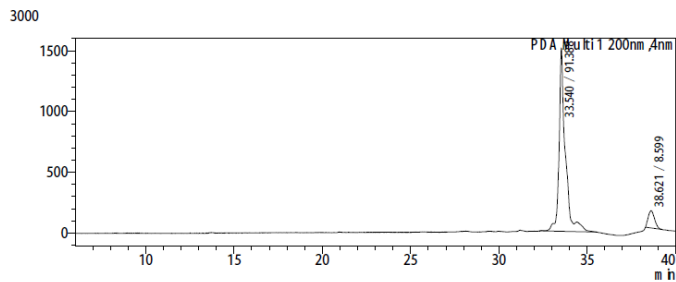

<ピークレポート>

| ピーク# | 保持時間   | 面積       | 高さ      | 面積%     |
|------|--------|----------|---------|---------|
| 1    | 0.141  | 3490     | 781     | 0.009   |
| 2    | 0.267  | 1861     | 636     | 0.005   |
| 3    | 33.540 | 37065225 | 1504895 | 91.388  |
| 4    | 38.621 | 3487455  | 141389  | 8.599   |
| 合計   |        | 40558030 | 1647702 | 100.000 |

Molecule 4-PEG-rhodamine

<サンプル情報>

サンプル名 : 20221007 4-PEG-rhodamine  
サンプルID : 20221007 4-PEG-rhodamine  
データファイル : 20221007 4-PEG-rhodamine  
メソッドファイル : Cholic acid Derivatives\_project.purity\_check.km  
バッチファイル :  
バイアル番号 : -1  
注入量 : 50 uL  
分析日時 : 2022/10/07 10:50:59  
解析日時 : 2022/10/07 13:06:10  
サンプルタイプ : 未知  
分析者 : System Administrator  
解析者 : System Administrator

<クロマトグラム>

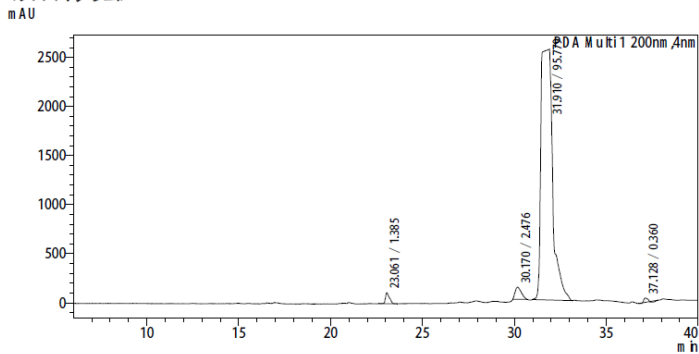

<ピークレポート>

| ピーク# | 保持時間   | 面積        | 高さ      | 面積%     |
|------|--------|-----------|---------|---------|
| 1    | 23.061 | 1632606   | 111501  | 1.385   |
| 2    | 30.170 | 2919184   | 124673  | 2.476   |
| 3    | 31.910 | 112918492 | 2555138 | 95.779  |
| 4    | 37.128 | 424322    | 43608   | 0.360   |
| 合計   |        | 117894605 | 2834921 | 100.000 |

2-OVAp

サンプル名 : 20221007 2-O VAp  
サンプルID : 20221007 2-O VAp  
データファイル : 20221007 2-O VAp1.kd  
メソッドファイル : Cholic Acid Derivatives\_project.purity\_check.km  
バッチファイル :  
バイアル番号 :  
注入量 : 50 uL  
分析日時 : 2022/10/07 16:27:43  
解析日時 : 2022/10/07 17:09:33  
サンプルタイプ : 未知  
分析者 : System Administrator  
解析者 : System Administrator

＜クロマトグラム＞

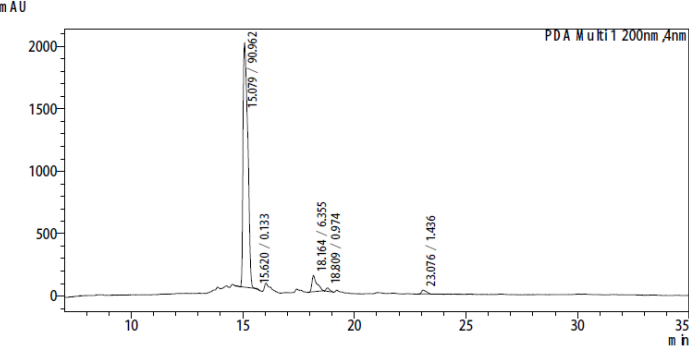

＜ピークレポート＞

| PDA Ch1 200nm |        |          |         |         |
|---------------|--------|----------|---------|---------|
| ピーク#          | 保持時間   | 面積       | 高さ      | 面積%     |
| 1             | 0.240  | 44369    | 6510    | 0.140   |
| 2             | 15.079 | 28746112 | 1956828 | 90.962  |
| 3             | 15.620 | 42027    | 6018    | 0.133   |
| 4             | 18.164 | 2008352  | 129951  | 6.355   |
| 5             | 18.809 | 307652   | 27446   | 0.974   |
| 6             | 23.076 | 453871   | 29821   | 1.436   |
| 合計            |        | 31602382 | 2156574 | 100.000 |

1. T. Ishikawa, F. Itoh, S. Yoshida, S. Saijo, T. Matsuzawa, T. Gonoj, T. Saito, Y. Okawa, N. Shibata, T. Miyamoto and S. Yamasaki, *Cell Host Microbe*, 2013, **13**, 477-488.
